# Supplementary material
Source: PubMed Central journal article supplement (PMC10703011)
Supplement: NIHMS1938135-supplement-1.pdf [file NIHMS1938135-supplement-1.pdf]

Data S1, related to Figure 1. LC-MS/MS analyses of native human IgA, and monomeric & dimeric KRAS<sup>G12D</sup>-specific IgA1.

### LC-MS/MS analysis of native IgA

| #   | Visible?                            | Starred?                            | Bio View:<br>50 Proteins in 46 Clusters<br>With 23 Filtered Out                                           | Accession Number | Alternate ID | Molecular Weight | Protein Grouping Ambiguity | BioSample 1 |
|-----|-------------------------------------|-------------------------------------|-----------------------------------------------------------------------------------------------------------|------------------|--------------|------------------|----------------------------|-------------|
| 1   | <input checked="" type="checkbox"/> | <input checked="" type="checkbox"/> | Immunoglobulin heavy constant alpha 1 OS=Homo sapiens OX=9606 GN=IGHA1 PE=1 SV=2                          | IGHA1_HUMAN      | IGHA1        | 38 kDa           | ★ 9                        | 9           |
| 2   | <input checked="" type="checkbox"/> | <input checked="" type="checkbox"/> | Cluster of Immunoglobulin kappa light chain OS=Homo sapiens OX=9606 PE=1 SV=1 (IGK_HUMAN)                 | IGK_HUMAN [2]    |              | 23 kDa           | ★ 8                        | 8           |
| 2.1 | <input checked="" type="checkbox"/> | <input checked="" type="checkbox"/> | Immunoglobulin kappa light chain OS=Homo sapiens OX=9606 PE=1 SV=1                                        | IGK_HUMAN        |              | 23 kDa           | ★ 6                        | 6           |
| 2.2 | <input checked="" type="checkbox"/> | <input checked="" type="checkbox"/> | Immunoglobulin kappa constant OS=Homo sapiens OX=9606 GN=IGKC PE=1 SV=2                                   | IGKC_HUMAN       | IGKC         | 12 kDa           | ★ 6                        | 6           |
| 3   | <input checked="" type="checkbox"/> | <input checked="" type="checkbox"/> | Cluster of Immunoglobulin lambda constant 2 OS=Homo sapiens OX=9606 GN=IGLC2 PE=1 SV=1 (IGLC2_HUMAN)      | IGLC2_HUMAN [3]  | IGLC2        | 11 kDa           | ★ 4                        | 4           |
| 3.1 | <input checked="" type="checkbox"/> | <input checked="" type="checkbox"/> | Immunoglobulin lambda constant 2 OS=Homo sapiens OX=9606 GN=IGLC2 PE=1 SV=1                               | IGLC2_HUMAN (+1) | IGLC2        | 11 kDa           | ★ 3                        | 3           |
| 3.2 | <input checked="" type="checkbox"/> | <input checked="" type="checkbox"/> | Immunoglobulin lambda-1 light chain OS=Homo sapiens OX=9606 PE=1 SV=1                                     | IGL1_HUMAN       |              | 23 kDa           | ★ 3                        | 3           |
| 4   | <input checked="" type="checkbox"/> | <input checked="" type="checkbox"/> | Immunoglobulin heavy constant mu OS=Homo sapiens OX=9606 GN=IGHM PE=1 SV=4                                | IGHM_HUMAN       | IGHM         | 49 kDa           | ★ 6                        | 6           |
| 5   | <input checked="" type="checkbox"/> | <input checked="" type="checkbox"/> | Cluster of Immunoglobulin kappa variable 3-20 OS=Homo sapiens OX=9606 GN=IGKV3-20 PE=1 SV=2 (KV320_HUMAN) | KV320_HUMAN [2]  | IGKV3-20     | 13 kDa           | ★ 3                        | 3           |
| 6   | <input checked="" type="checkbox"/> | <input checked="" type="checkbox"/> | Immunoglobulin J chain OS=Homo sapiens OX=9606 GN=JCHAIN PE=1 SV=4                                        | IGJ_HUMAN        | JCHAIN       | 18 kDa           | ★ 2                        | 2           |
| 7   | <input checked="" type="checkbox"/> | <input checked="" type="checkbox"/> | Cluster of Immunoglobulin heavy variable 3-9 OS=Homo sapiens OX=9606 GN=IGHV3-9 PE=1 SV=2 (HV309_HUMAN)   | HV309_HUMAN [3]  | IGHV3-9      | 13 kDa           | ★ 4                        | 4           |
| 8   | <input checked="" type="checkbox"/> | <input checked="" type="checkbox"/> | Immunoglobulin heavy variable 3-23 OS=Homo sapiens OX=9606 GN=IGHV3-23 PE=1 SV=2                          | HV323_HUMAN (+2) | IGHV3-23     | 13 kDa           | ★ 2                        | 2           |
| 9   | <input checked="" type="checkbox"/> | <input checked="" type="checkbox"/> | Immunoglobulin lambda variable 1-51 OS=Homo sapiens OX=9606 GN=IGLV1-51 PE=1 SV=2                         | LV151_HUMAN      | IGLV1-51     | 12 kDa           | ★ 2                        | 2           |
| 10  | <input checked="" type="checkbox"/> | <input checked="" type="checkbox"/> | Immunoglobulin alpha-2 heavy chain OS=Homo sapiens OX=9606 PE=1 SV=2                                      | IGA2_HUMAN       |              | 49 kDa           | ★ 4                        | 4           |
| 11  | <input checked="" type="checkbox"/> | <input checked="" type="checkbox"/> | Immunoglobulin lambda variable 3-10 OS=Homo sapiens OX=9606 GN=IGLV3-10 PE=3 SV=2                         | LV310_HUMAN      | IGLV3-10     | 12 kDa           | ★ 1                        | 1           |
| 12  | <input checked="" type="checkbox"/> | <input checked="" type="checkbox"/> | Immunoglobulin kappa variable 3-15 OS=Homo sapiens OX=9606 GN=IGKV3-15 PE=1 SV=2                          | KV315_HUMAN (+1) | IGKV3-15     | 12 kDa           | ★ 1                        | 1           |
| 13  | <input checked="" type="checkbox"/> | <input checked="" type="checkbox"/> | Immunoglobulin heavy variable 4-34 OS=Homo sapiens OX=9606 GN=IGHV4-34 PE=1 SV=2                          | HV434_HUMAN (+4) | IGHV4-34     | 14 kDa           | ★ 2                        | 2           |
| 14  | <input checked="" type="checkbox"/> | <input checked="" type="checkbox"/> | Immunoglobulin kappa variable 4-1 OS=Homo sapiens OX=9606 GN=IGKV4-1 PE=1 SV=1                            | KV401_HUMAN      | IGKV4-1      | 13 kDa           | ★ 2                        | 2           |
| 15  | <input checked="" type="checkbox"/> | <input checked="" type="checkbox"/> | Immunoglobulin heavy variable 1-3 OS=Homo sapiens OX=9606 GN=IGHV1-3 PE=3 SV=1                            | HV103_HUMAN      | IGHV1-3      | 13 kDa           | ★ 1                        | 1           |
| 16  | <input checked="" type="checkbox"/> | <input checked="" type="checkbox"/> | Immunoglobulin heavy variable 1-2 OS=Homo sapiens OX=9606 GN=IGHV1-2 PE=1 SV=2                            | HV102_HUMAN      | IGHV1-2      | 13 kDa           | ★ 1                        | 1           |
| 17  | <input checked="" type="checkbox"/> | <input checked="" type="checkbox"/> | Immunoglobulin kappa variable 3-11 OS=Homo sapiens OX=9606 GN=IGKV3-11 PE=1 SV=1                          | KV311_HUMAN (+1) | IGKV3-11     | 13 kDa           | ★ 1                        | 1           |
| 18  | <input checked="" type="checkbox"/> | <input checked="" type="checkbox"/> | Immunoglobulin lambda variable 1-47 OS=Homo sapiens OX=9606 GN=IGLV1-47 PE=1 SV=2                         | LV147_HUMAN      | IGLV1-47     | 12 kDa           | ★ 1                        | 1           |
| 19  | <input checked="" type="checkbox"/> | <input checked="" type="checkbox"/> | Immunoglobulin lambda variable 3-21 OS=Homo sapiens OX=9606 GN=IGLV3-21 PE=1 SV=2                         | LV321_HUMAN (+1) | IGLV3-21     | 12 kDa           | ★ 1                        | 1           |
| 20  | <input checked="" type="checkbox"/> | <input checked="" type="checkbox"/> | Immunoglobulin heavy variable 3-49 OS=Homo sapiens OX=9606 GN=IGHV3-49 PE=3 SV=1                          | HV349_HUMAN      | IGHV3-49     | 13 kDa           | ★ 1                        | 1           |
| 21  | <input checked="" type="checkbox"/> | <input checked="" type="checkbox"/> | Immunoglobulin kappa variable 2D-30 OS=Homo sapiens OX=9606 GN=IGKV2D-30 PE=3 SV=1                        | KVD30_HUMAN      | IGKV2D-30    | 13 kDa           | ★ 1                        | 1           |
| 22  | <input checked="" type="checkbox"/> | <input checked="" type="checkbox"/> | Immunoglobulin lambda variable 3-19 OS=Homo sapiens OX=9606 GN=IGLV3-19 PE=1 SV=2                         | LV319_HUMAN      | IGLV3-19     | 12 kDa           | ★ 1                        | 1           |
| 23  | <input checked="" type="checkbox"/> | <input checked="" type="checkbox"/> | Immunoglobulin heavy variable 3-64D OS=Homo sapiens OX=9606 GN=IGHV3-64D PE=3 SV=1                        | HV64D_HUMAN      | IGHV3-64D    | 13 kDa           | ★ 1                        | 1           |

### LC-MS/MS analysis of purified monomeric and dimeric KRas<sup>G12D</sup> IgA1

| # | Visible?                            | Starred?                            | Bio View:<br>777 Proteins in 712 Clusters<br>With 771 Filtered Out                                                                      | Accession Number | Molecular Weight | Protein Grouping Ambiguity | Dimer | Mono... |
|---|-------------------------------------|-------------------------------------|-----------------------------------------------------------------------------------------------------------------------------------------|------------------|------------------|----------------------------|-------|---------|
| 1 | <input checked="" type="checkbox"/> | <input checked="" type="checkbox"/> | Immunoglobulin heavy constant alpha 1 OS=Homo sapiens OX=9606 GN=IGHA1 PE=1 SV=2                                                        | IGHA1_HUMAN      | 38 kDa           | ★ 9                        | 8     | 8       |
| 2 | <input checked="" type="checkbox"/> | <input checked="" type="checkbox"/> | Immunoglobulin superfamily member 3 OS=Homo sapiens OX=9606 GN=IGSF3 PE=2 SV=3                                                          | IGSF3_HUMAN      | 135 kDa          | ★ 3                        | 6     | 6       |
| 3 | <input checked="" type="checkbox"/> | <input checked="" type="checkbox"/> | Immunoglobulin J chain OS=Homo sapiens OX=9606 GN=JCHAIN PE=1 SV=4                                                                      | IGJ_HUMAN        | 18 kDa           | ★ 2                        |       |         |
| 4 | <input checked="" type="checkbox"/> | <input checked="" type="checkbox"/> | Immunoglobulin kappa constant OS=Homo sapiens OX=9606 GN=IGKC PE=1 SV=2                                                                 | IGKC_HUMAN       | 12 kDa           | ★ 3                        | 1     | 1       |
| 5 | <input checked="" type="checkbox"/> | <input checked="" type="checkbox"/> | Leucine-rich repeat and immunoglobulin-like domain-containing nogo receptor-interacting protein 1 OS=Homo sapiens OX=9606 GN=LINGO1 ... | LINGO1_HUMAN     | 70 kDa           | ★ 1                        |       | 1       |
| 6 | <input checked="" type="checkbox"/> | <input checked="" type="checkbox"/> | Immunoglobulin heavy variable 3-30 OS=Homo sapiens OX=9606 GN=IGHV3-30 PE=1 SV=2                                                        | HV330_HUMAN      | 13 kDa           | ★ 1                        |       |         |
