# Supplementary material
Source: PubMed Central journal article supplement (PMC10703011)
Supplement: NIHMS1938135-supplement-3.pdf [file NIHMS1938135-supplement-3.pdf]

**Data S3, related to Figures 3-6 and Supplemental Figures 3-5:** Details of statistical methods and associated *P* values.

**Figure 3A**

| <i>KRas</i> <sup>G12D</sup> Transduced OVCAR3 MTT assay                  | Day 3    | Day 5    | Day 7    |
|--------------------------------------------------------------------------|----------|----------|----------|
| Between Vehicle and IrrIgA (I.IgA)                                       | P=0.8273 | P=0.1791 | P=0.4879 |
| Between Vehicle and anti- <i>KRas</i> <sup>G12D</sup> IgA (K-IgA)        | P=0.0006 | P<0.0001 | P<0.0001 |
| Between IrrIgA (I.IgA) and anti- <i>KRas</i> <sup>G12D</sup> IgA (K-IgA) | P<0.0001 | P<0.0001 | P<0.0001 |

Statistical test used- Unpaired two-tailed t-test

**Figure 3B**

| <i>KRas</i> <sup>WT</sup> Transduced OVCAR3 MTT assay            | Day 3    | Day 5    | Day 7    |
|------------------------------------------------------------------|----------|----------|----------|
| Between Vehicle and IrrIgA (I.IgA)                               | P=7.7812 | P=0.2373 | P=0.4179 |
| Between Vehicle and anti-KRas <sup>G12D</sup> IgA (K-IgA)        | P=0.5251 | P=0.3418 | P=0.7868 |
| Between IrrIgA (I.IgA) and anti-KRas <sup>G12D</sup> IgA (K-IgA) | P=0.9170 | P=0.5375 | P=0.3393 |

Statistical test used- Unpaired two-tailed t-test

**Figure 3C*****Untransduced OVCAR3 MTT assay***

|                                                                  | Day 3    | Day 5    | Day 7    |
|------------------------------------------------------------------|----------|----------|----------|
| Between Vehicle and IrrIgA (I.IgA)                               | P<0.0001 | P<0.0001 | P<0.0001 |
| Between Vehicle and anti-KRas <sup>G12D</sup> IgA (K-IgA)        | P<0.0001 | P<0.0001 | P<0.0001 |
| Between IrrIgA (I.IgA) and anti-KRas <sup>G12D</sup> IgA (K-IgA) | P=0.0116 | P=0.4547 | P=0.9658 |

Statistical test used- Unpaired two-tailed t-test

**Figure 3D*****SK-LU-1 MTT assay***

|                                                                  | Day 3    | Day 5    | Day 7    |
|------------------------------------------------------------------|----------|----------|----------|
| Between Vehicle and IrrIgA (I.IgA)                               | P=0.6725 | P=0.0684 | P=0.2292 |
| Between Vehicle and anti-KRas <sup>G12D</sup> IgA (K-IgA)        | P<0.0001 | P<0.0001 | P<0.0001 |
| Between IrrIgA (I.IgA) and anti-KRas <sup>G12D</sup> IgA (K-IgA) | P<0.0001 | P<0.0001 | P<0.0001 |

Statistical test used- Unpaired two-tailed t-test

**Figure 3E*****HEK293T MTT assay***

|                                                                  | Day 3    | Day 5    | Day 7    |
|------------------------------------------------------------------|----------|----------|----------|
| Between Vehicle and IrrIgA (I.IgA)                               | P=0.1438 | P=0.4007 | P=0.1278 |
| Between Vehicle and anti-KRas <sup>G12D</sup> IgA (K-IgA)        | P=0.6589 | P=0.8223 | P=0.5029 |
| Between IrrIgA (I.IgA) and anti-KRas <sup>G12D</sup> IgA (K-IgA) | P=0.087  | P=0.2485 | P=0.0768 |

Statistical test used- Unpaired two-tailed t-test

### **Figure 3F**

#### *AnnexinV positive cells*

|                                                                           |          |
|---------------------------------------------------------------------------|----------|
| Between Vehicle and IrrIgA                                                | P=0.7532 |
| Between Vehicle and anti-KRas <sup>G12D</sup> IgA1                        | P=0.7526 |
| Between Vehicle and anti-KRas <sup>G12D</sup> IgG4                        | P=0.8355 |
| Between IrrIgA and anti-KRas <sup>G12D</sup> IgA1                         | P=0.1452 |
| Between IrrIgA and anti-KRas <sup>G12D</sup> IgG4                         | P=0.2431 |
| Between anti-KRas <sup>G12D</sup> IgA1 and anti-KRas <sup>G12D</sup> IgG4 | P=0.7223 |

Statistical test used- Unpaired two-tailed t-test

**Figure 4B*****Tumor volumes of KRas<sup>G12D</sup> OVCAR3 tumor in Rag1-deficient mice***

|                                                                           |          |
|---------------------------------------------------------------------------|----------|
| Between Vehicle and IrrIgA                                                | P=0.0470 |
| Between Vehicle and anti-KRas <sup>G12D</sup> IgA1                        | P=0.0448 |
| Between Vehicle and anti-KRas <sup>G12D</sup> IgG4                        | P=0.0630 |
| Between IrrIgA and anti-KRas <sup>G12D</sup> IgA1                         | P=0.0422 |
| Between IrrIgA and anti-KRas <sup>G12D</sup> IgG4                         | P=0.0335 |
| Between anti-KRas <sup>G12D</sup> IgA1 and anti-KRas <sup>G12D</sup> IgG4 | P=0.0381 |

Statistical test used-Paired two-tailed t-test

***Tumor weights of KRas<sup>G12D</sup> OVCAR3 tumor in Rag1-deficient mice***

|                                                                           |          |
|---------------------------------------------------------------------------|----------|
| Between Vehicle and IrrIgA                                                | P<0.0001 |
| Between Vehicle and anti-KRas <sup>G12D</sup> IgA1                        | P<0.0001 |
| Between Vehicle and anti-KRas <sup>G12D</sup> IgG4                        | P=0.0018 |
| Between IrrIgA and anti-KRas <sup>G12D</sup> IgA1                         | P<0.0001 |
| Between IrrIgA and anti-KRas <sup>G12D</sup> IgG4                         | P=0.0682 |
| Between anti-KRas <sup>G12D</sup> IgA1 and anti-KRas <sup>G12D</sup> IgG4 | P<0.0001 |

Statistical test used-Unpaired two-tailed t-test



## **Figure 4C**

### ***Tumor volumes of KRas<sup>WT</sup> OVCAR3 tumor in Rag1-deficient mice***

|                                                                           |          |
|---------------------------------------------------------------------------|----------|
| Between Vehicle and IrrIgA                                                | P=0.0321 |
| Between Vehicle and anti-KRas <sup>G12D</sup> IgA1                        | P=0.0358 |
| Between Vehicle and anti-KRas <sup>G12D</sup> IgG4                        | P=0.8100 |
| Between IrrIgA and anti-KRas <sup>G12D</sup> IgA1                         | P=0.2507 |
| Between IrrIgA and anti-KRas <sup>G12D</sup> IgG4                         | P=0.0185 |
| Between anti-KRas <sup>G12D</sup> IgA1 and anti-KRas <sup>G12D</sup> IgG4 | P=0.0207 |

Statistical test used-Paired two-tailed t-test

### ***Tumor weights of KRas<sup>WT</sup> OVCAR3 tumor in Rag1-deficient mice***

|                                                                           |          |
|---------------------------------------------------------------------------|----------|
| Between Vehicle and IrrIgA                                                | P<0.0001 |
| Between Vehicle and anti-KRas <sup>G12D</sup> IgA1                        | P<0.0001 |
| Between Vehicle and anti-KRas <sup>G12D</sup> IgG4                        | P=0.2042 |
| Between IrrIgA and anti-KRas <sup>G12D</sup> IgA1                         | P=0.9704 |
| Between IrrIgA and anti-KRas <sup>G12D</sup> IgG4                         | P<0.0001 |
| Between anti-KRas <sup>G12D</sup> IgA1 and anti-KRas <sup>G12D</sup> IgG4 | P<0.0001 |

Statistical test used-Unpaired two-tailed t-test

## **Figure 4D**

### ***Tumor volumes of KRas<sup>G12D</sup> OVCAR3 tumor in NSG mice***

|                                                                 |          |
|-----------------------------------------------------------------|----------|
| Between Vehicle and anti-KRas <sup>G12D</sup> IgA1              | P=0.0471 |
| Between Vehicle and MRTX1133 every 4 day                        | P=0.0454 |
| Between Vehicle and MRTX1133 daily                              | P=0.0495 |
| Between MRTX1133 every 4 day and anti-KRas <sup>G12D</sup> IgA1 | P=0.0499 |
| Between MRTX1133 daily and anti-KRas <sup>G12D</sup> IgA1       | P=0.0323 |
| Between MRTX1133 every 4 day and MRTX1133 daily                 | P=0.0580 |

Statistical test used-Paired two-tailed t-test

### ***Tumor weights of KRas<sup>G12D</sup> OVCAR3 tumor in NSG mice***

|                                                                 |          |
|-----------------------------------------------------------------|----------|
| Between Vehicle and anti-KRas <sup>G12D</sup> IgA1              | P<0.0001 |
| Between Vehicle and MRTX1133 every 4 day                        | P=0.0195 |
| Between Vehicle and MRTX1133 daily                              | P<0.0001 |
| Between MRTX1133 every 4 day and anti-KRas <sup>G12D</sup> IgA1 | P=0.0005 |
| Between MRTX1133 daily and anti-KRas <sup>G12D</sup> IgA1       | P=0.1676 |
| Between MRTX1133 every 4 day and MRTX1133 daily                 | P=0.0036 |

Statistical test used-Unpaired two-tailed t-test

## **Figure 5B**

Low (lowest 30%) vs. High (top 30%) number of CD3<sup>+</sup> cells in PCK<sup>+</sup> tumor area

|                                                        |          |
|--------------------------------------------------------|----------|
| % of IgA coated cells in PCK <sup>+</sup> cells        | P<0.0001 |
| % of IgA-PIGR colocalization in PCK <sup>+</sup> cells | P<0.0001 |
| % of IgG coated cells in PCK <sup>+</sup> cells        | P<0.0001 |
| % of PIGR <sup>+</sup> cells PCK <sup>+</sup> cells    | P=0.0018 |

Statistical test used-Unpaired two-tailed t-test

## **Figure 5D**

### ***Tumor volumes of KRas<sup>G12D</sup> A427 tumor in NSG mice***

|                                                                           |          |
|---------------------------------------------------------------------------|----------|
| Between Vehicle and anti-KRas <sup>G12D</sup> IgA1                        | P=0.0220 |
| Between Vehicle and anti-KRas <sup>G12D</sup> IgG4                        | P=0.0264 |
| Between Vehicle and MRTX1133 every 4 day                                  | P=0.0331 |
| Between Vehicle and MRTX1133 daily                                        | P=0.0197 |
| Between MRTX1133 every 4 day and anti-KRas <sup>G12D</sup> IgA1           | P=0.0134 |
| Between MRTX1133 daily and anti-KRas <sup>G12D</sup> IgA1                 | P=0.0309 |
| Between MRTX1133 every 4 day and anti-KRas <sup>G12D</sup> IgG4           | P=0.0568 |
| Between MRTX1133 daily and anti-KRas <sup>G12D</sup> IgG4                 | P=0.0145 |
| Between anti-KRas <sup>G12D</sup> IgG4 and anti-KRas <sup>G12D</sup> IgA1 | P=0.0205 |
| Between MRTX1133 every 4 day and MRTX1133 daily                           | P=0.0047 |

Statistical test used-Paired two-tailed t-test

### ***Tumor weights of KRas<sup>G12D</sup> A427 tumor in NSG mice***

|                                                                           |          |
|---------------------------------------------------------------------------|----------|
| Between Vehicle and anti-KRas <sup>G12D</sup> IgA1                        | P<0.0001 |
| Between Vehicle and anti-KRas <sup>G12D</sup> IgG4                        | P=0.1670 |
| Between Vehicle and MRTX1133 every 4 day                                  | P=0.0184 |
| Between Vehicle and MRTX1133 daily                                        | P=0.0010 |
| Between MRTX1133 every 4 day and anti-KRas <sup>G12D</sup> IgA1           | P<0.0001 |
| Between MRTX1133 daily and anti-KRas <sup>G12D</sup> IgA1                 | P=0.0002 |
| Between MRTX1133 every 4 day and anti-KRas <sup>G12D</sup> IgG4           | P=0.2699 |
| Between MRTX1133 daily and anti-KRas <sup>G12D</sup> IgG4                 | P=0.0169 |
| Between anti-KRas <sup>G12D</sup> IgG4 and anti-KRas <sup>G12D</sup> IgA1 | P<0.0001 |
| Between MRTX1133 every 4 day and MRTX1133 daily                           | P=0.0818 |

Statistical test used-Unpaired two-tailed t-test

## **Figure 5F**

### ***Tumor volumes of KRas<sup>G12D</sup> SK-LU-1 tumor in NSG mice***

|                                                                           |          |
|---------------------------------------------------------------------------|----------|
| Between Vehicle and anti-KRas <sup>G12D</sup> IgA1                        | P=0.0308 |
| Between Vehicle and anti-KRas <sup>G12D</sup> IgG4                        | P=0.0597 |
| Between Vehicle and MRTX1133 every 4 day                                  | P=0.0491 |
| Between Vehicle and MRTX1133 daily                                        | P=0.0259 |
| Between MRTX1133 every 4 day and anti-KRas <sup>G12D</sup> IgA1           | P=0.0235 |
| Between MRTX1133 daily and anti-KRas <sup>G12D</sup> IgA1                 | P=0.0485 |
| Between MRTX1133 every 4 day and anti-KRas <sup>G12D</sup> IgG4           | P=0.0404 |
| Between MRTX1133 daily and anti-KRas <sup>G12D</sup> IgG4                 | P=0.0190 |
| Between anti-KRas <sup>G12D</sup> IgG4 and anti-KRas <sup>G12D</sup> IgA1 | P=0.0263 |
| Between MRTX1133 every 4 day and MRTX1133 daily                           | P=0.0135 |

Statistical test used-Paired two-tailed t-test

### ***Tumor weights of KRas<sup>G12D</sup> SK-LU-1 tumor in NSG mice***

|                                                                           |          |
|---------------------------------------------------------------------------|----------|
| Between Vehicle and anti-KRas <sup>G12D</sup> IgA1                        | P=0.0095 |
| Between Vehicle and anti-KRas <sup>G12D</sup> IgG4                        | P=0.5249 |
| Between Vehicle and MRTX1133 every 4 day                                  | P=0.2525 |
| Between Vehicle and MRTX1133 daily                                        | P=0.0279 |
| Between MRTX1133 every 4 day and anti-KRas <sup>G12D</sup> IgA1           | P=0.0259 |
| Between MRTX1133 daily and anti-KRas <sup>G12D</sup> IgA1                 | P=0.2028 |
| Between MRTX1133 every 4 day and anti-KRas <sup>G12D</sup> IgG4           | P=0.5024 |
| Between MRTX1133 daily and anti-KRas <sup>G12D</sup> IgG4                 | P=0.0265 |
| Between anti-KRas <sup>G12D</sup> IgG4 and anti-KRas <sup>G12D</sup> IgA1 | P=0.0060 |
| Between MRTX1133 every 4 day and MRTX1133 daily                           | P=0.1142 |

Statistical test used-Unpaired two-tailed t-test

## Figure 5G

### *Tumor volumes of KRas<sup>G12D</sup> KPMSH2<sup>KIN</sup> tumor in C57/BL6 mice*

|                                                                                               |          |
|-----------------------------------------------------------------------------------------------|----------|
| Between Vehicle and anti-KRas <sup>G12D</sup> IgA1                                            | P=0.0313 |
| Between Vehicle and anti-KRas <sup>G12D</sup> IgA1 with CD8 depletion                         | P=0.0313 |
| Between Vehicle and anti-IDH1 <sup>R132H</sup> IgA1                                           | P=0.0625 |
| Between Vehicle and only CD8 depletion                                                        | P>0.9999 |
| Between anti-KRas <sup>G12D</sup> IgA1 and anti-KRas <sup>G12D</sup> IgA1 with CD8 depletion  | P=0.0313 |
| Between anti-KRas <sup>G12D</sup> IgA1 and anti-IDH1 <sup>R132H</sup> IgA1                    | P=0.0313 |
| Between anti-KRas <sup>G12D</sup> IgA1 and only CD8 depletion                                 | P=0.0313 |
| Between anti-IDH1 <sup>R132H</sup> IgA1 and only CD8 depletion                                | P=0.1563 |
| Between anti-IDH1 <sup>R132H</sup> IgA1 and anti-KRas <sup>G12D</sup> IgA1 with CD8 depletion | P>0.9999 |
| Between anti-KRas <sup>G12D</sup> IgA1 with CD8 depletion and only CD8 depletion              | P=0.0313 |

Statistical test used-Paired two-tailed non-parametric Wilcoxon test

**Figure 6C*****Tumor volumes of Untransduced IDH1<sup>+R132H</sup> HCT116 tumor in NSG mice***

Between Vehicle and anti-IDH1<sup>R132H</sup> IgA1 P=0.0380

Between Vehicle and irrelevant IgA P=0.0695

Between irrelevant IgA and anti-IDH1<sup>R132H</sup> IgA1 P=0.0497

Statistical test used-Paired two-tailed t-test

***Tumor volumes of Untransduced IDH1<sup>+R132H</sup> HCT116 tumor in NSG mice***

Between Vehicle and anti-IDH1<sup>R132H</sup> IgA1 P=0.0002

Between Vehicle and irrelevant IgA P=0.1792

Between irrelevant IgA and anti-IDH1<sup>R132H</sup> IgA1 P=0.0017

Statistical test used-Unpaired two-tailed t-test

**Figure 6D*****Tumor volumes of Untransduced IDH1<sup>+/+</sup> HCT116 tumor in NSG mice***

|                                                            |          |
|------------------------------------------------------------|----------|
| Between Vehicle and anti-IDH1 <sup>R132H</sup> IgA1        | P=0.2119 |
| Between Vehicle and irrelevant IgA                         | P=0.3181 |
| Between irrelevant IgA and anti-IDH1 <sup>R132H</sup> IgA1 | P=0.4161 |

Statistical test used-Paired two-tailed t-test

***Tumor volumes of Untransduced IDH1<sup>+/+</sup> HCT116 tumor in NSG mice***

|                                                            |          |
|------------------------------------------------------------|----------|
| Between Vehicle and anti-IDH1 <sup>R132H</sup> IgA1        | P=0.9715 |
| Between Vehicle and irrelevant IgA                         | P=0.5912 |
| Between irrelevant IgA and anti-IDH1 <sup>R132H</sup> IgA1 | P=0.5782 |

Statistical test used-Unpaired two-tailed t-test



**Figure 6E*****Tumor volumes of PIGR<sup>transduced</sup> IDH1<sup>+R132H</sup> HCT116 tumor in NSG mice***

|                                                            |          |
|------------------------------------------------------------|----------|
| Between Vehicle and anti-IDH1 <sup>R132H</sup> IgA1        | P=0.0249 |
| Between Vehicle and irrelevant IgA                         | P=0.0265 |
| Between irrelevant IgA and anti-IDH1 <sup>R132H</sup> IgA1 | P=0.0216 |

Statistical test used-Paired two-tailed t-test

***Tumor volumes of PIGR<sup>transduced</sup> IDH1<sup>+R132H</sup> HCT116 tumor in NSG mice***

|                                                            |          |
|------------------------------------------------------------|----------|
| Between Vehicle and anti-IDH1 <sup>R132H</sup> IgA1        | P<0.0001 |
| Between Vehicle and irrelevant IgA                         | P<0.0001 |
| Between irrelevant IgA and anti-IDH1 <sup>R132H</sup> IgA1 | P<0.0001 |

Statistical test used-Unpaired two-tailed t-test

**Figure 6F*****Tumor volumes of PIGR<sup>transduced</sup> IDH1<sup>+/+</sup> HCT116 tumor in NSG mice***

|                                                            |          |
|------------------------------------------------------------|----------|
| Between Vehicle and anti-IDH1 <sup>R132H</sup> IgA1        | P=0.0167 |
| Between Vehicle and irrelevant IgA                         | P=0.0175 |
| Between irrelevant IgA and anti-IDH1 <sup>R132H</sup> IgA1 | P=0.7884 |

Statistical test used-Paired two-tailed t-test

***Tumor volumes of PIGR<sup>transduced</sup> IDH1<sup>+/+</sup> HCT116 tumor in NSG mice***

|                                                            |          |
|------------------------------------------------------------|----------|
| Between Vehicle and anti-IDH1 <sup>R132H</sup> IgA1        | P<0.0001 |
| Between Vehicle and irrelevant IgA                         | P<0.0001 |
| Between irrelevant IgA and anti-IDH1 <sup>R132H</sup> IgA1 | P=0.8902 |

Statistical test used-Unpaired two-tailed t-test

**Figure 6G*****Tumor volumes of Untransduced IDH1<sup>+R132H</sup> HCT116 tumor in NSG mice***

|                                                                                               |          |
|-----------------------------------------------------------------------------------------------|----------|
| Between Vehicle and anti-IDH1 <sup>R132H</sup> dimeric IgA1                                   | P=0.0384 |
| Between Vehicle and anti-IDH1 <sup>R132H</sup> monomeric IgA1                                 | P=0.0751 |
| Between Vehicle and anti-IDH1 <sup>R132H</sup> IgG4                                           | P=0.7551 |
| Between anti-IDH1 <sup>R132H</sup> dimeric IgA1 and anti-IDH1 <sup>R132H</sup> monomeric IgA1 | P=0.0272 |
| Between anti-IDH1 <sup>R132H</sup> dimeric IgA1 and anti-IDH1 <sup>R132H</sup> IgG4           | P=0.0263 |
| Between anti-IDH1 <sup>R132H</sup> monomeric IgA1 and anti-IDH1 <sup>R132H</sup> IgG4         | P=0.0406 |

Statistical test used-Paired two-tailed t-test

### **Supplemental Figure 3B**

#### ***Tumor volumes of KRas<sup>G12D</sup> OVCAR3 tumor in Rag1-deficient mice***

|                                                                           |          |
|---------------------------------------------------------------------------|----------|
| Between Vehicle and IrrIgA                                                | P=0.0470 |
| Between Vehicle and anti-KRas <sup>G12D</sup> IgA1                        | P=0.0448 |
| Between Vehicle and anti-KRas <sup>G12D</sup> IgG4                        | P=0.0630 |
| Between IrrIgA and anti-KRas <sup>G12D</sup> IgA1                         | P=0.0422 |
| Between IrrIgA and anti-KRas <sup>G12D</sup> IgG4                         | P=0.0335 |
| Between anti-KRas <sup>G12D</sup> IgA1 and anti-KRas <sup>G12D</sup> IgG4 | P=0.0381 |
| Between MRTX1133 every 4 Day and Vehicle                                  | P=0.0647 |
| Between MRTX1133 every 4 Day and IrrIgA                                   | P=0.0381 |
| Between MRTX1133 every 4 Day and anti-KRas <sup>G12D</sup> IgA1           | P=0.0392 |
| Between MRTX1133 every 4 Day and anti-KRas <sup>G12D</sup> IgG4           | P=0.2876 |
| Between MRTX1133 daily and Vehicle                                        | P=0.0596 |
| Between MRTX1133 daily and IrrIgA                                         | P=0.0864 |
| Between MRTX1133 daily and anti-KRas <sup>G12D</sup> IgA1                 | P=0.0028 |
| Between MRTX1133 daily and anti-KRas <sup>G12D</sup> IgG4                 | P=0.0596 |
| Between MRTX1133 every 4 Day and MRTX1133 daily                           | P=0.0599 |

Statistical test used-Paired two-tailed t-test

#### ***Tumor weights of KRas<sup>G12D</sup> OVCAR3 tumor in Rag1-deficient mice***

|                                                                           |          |
|---------------------------------------------------------------------------|----------|
| Between Vehicle and IrrIgA                                                | P<0.0001 |
| Between Vehicle and anti-KRas <sup>G12D</sup> IgA1                        | P<0.0001 |
| Between Vehicle and anti-KRas <sup>G12D</sup> IgG4                        | P=0.0018 |
| Between IrrIgA and anti-KRas <sup>G12D</sup> IgA1                         | P<0.0001 |
| Between IrrIgA and anti-KRas <sup>G12D</sup> IgG4                         | P=0.0682 |
| Between anti-KRas <sup>G12D</sup> IgA1 and anti-KRas <sup>G12D</sup> IgG4 | P<0.0001 |
| Between MRTX1133 every 4 Day and Vehicle                                  | P=0.0088 |
| Between MRTX1133 every 4 Day and IrrIgA                                   | P=0.0229 |
| Between MRTX1133 every 4 Day and anti-KRas <sup>G12D</sup> IgA1           | P<0.0001 |
| Between MRTX1133 every 4 Day and anti-KRas <sup>G12D</sup> IgG4           | P=0.4957 |
| Between MRTX1133 daily and Vehicle                                        | P<0.0001 |
| Between MRTX1133 daily and IrrIgA                                         | P=0.0009 |
| Between MRTX1133 daily and anti-KRas <sup>G12D</sup> IgA1                 | P=0.0044 |
| Between MRTX1133 daily and anti-KRas <sup>G12D</sup> IgG4                 | P<0.0001 |
| Between MRTX1133 every 4 Day and MRTX1133 daily                           | P<0.0001 |

Statistical test used-Unpaired two-tailed t-test

### Supplemental Figure 3C

#### *Tumor volumes of KRas<sup>WT</sup> OVCAR3 tumor in Rag1-deficient mice*

|                                                                           |          |
|---------------------------------------------------------------------------|----------|
| Between Vehicle and IrrIgA                                                | P=0.0321 |
| Between Vehicle and anti-KRas <sup>G12D</sup> IgA1                        | P=0.0358 |
| Between Vehicle and anti-KRas <sup>G12D</sup> IgG4                        | P=0.8100 |
| Between IrrIgA and anti-KRas <sup>G12D</sup> IgA1                         | P=0.2507 |
| Between IrrIgA and anti-KRas <sup>G12D</sup> IgG4                         | P=0.0185 |
| Between anti-KRas <sup>G12D</sup> IgA1 and anti-KRas <sup>G12D</sup> IgG4 | P=0.0207 |
| Between MRTX1133 every 4 Day and Vehicle                                  | P=0.2304 |
| Between MRTX1133 every 4 Day and IrrIgA                                   | P=0.0245 |
| Between MRTX1133 every 4 Day and anti-KRas <sup>G12D</sup> IgA1           | P=0.0277 |
| Between MRTX1133 every 4 Day and anti-KRas <sup>G12D</sup> IgG4           | P=0.0236 |
| Between MRTX1133 daily and Vehicle                                        | P=0.3923 |
| Between MRTX1133 daily and IrrIgA                                         | P=0.0295 |
| Between MRTX1133 daily and anti-KRas <sup>G12D</sup> IgA1                 | P=0.0330 |
| Between MRTX1133 daily and anti-KRas <sup>G12D</sup> IgG4                 | P=0.7432 |
| Between MRTX1133 every 4 Day and MRTX1133 daily                           | P=0.1060 |

Statistical test used-Paired two-tailed t-test

#### *Tumor weights of KRas<sup>WT</sup> OVCAR3 tumor in Rag1-deficient mice*

|                                                                           |          |
|---------------------------------------------------------------------------|----------|
| Between Vehicle and IrrIgA                                                | P<0.0001 |
| Between Vehicle and anti-KRas <sup>G12D</sup> IgA1                        | P<0.0001 |
| Between Vehicle and anti-KRas <sup>G12D</sup> IgG4                        | P=0.2042 |
| Between IrrIgA and anti-KRas <sup>G12D</sup> IgA1                         | P=0.9704 |
| Between IrrIgA and anti-KRas <sup>G12D</sup> IgG4                         | P<0.0001 |
| Between anti-KRas <sup>G12D</sup> IgA1 and anti-KRas <sup>G12D</sup> IgG4 | P<0.0001 |
| Between MRTX1133 every 4 Day and Vehicle                                  | P=0.2042 |
| Between MRTX1133 every 4 Day and IrrIgA                                   | P<0.0001 |
| Between MRTX1133 every 4 Day and anti-KRas <sup>G12D</sup> IgA1           | P<0.0001 |
| Between MRTX1133 every 4 Day and anti-KRas <sup>G12D</sup> IgG4           | P=0.1377 |
| Between MRTX1133 daily and Vehicle                                        | P=0.6154 |
| Between MRTX1133 daily and IrrIgA                                         | P<0.0001 |
| Between MRTX1133 daily and anti-KRas <sup>G12D</sup> IgA1                 | P<0.0001 |
| Between MRTX1133 daily and anti-KRas <sup>G12D</sup> IgG4                 | P=0.4248 |
| Between MRTX1133 every 4 Day and MRTX1133 daily                           | P=0.5037 |

Statistical test used-Unpaired two-tailed t-test

## Supplemental Figure 4B

### *Tumor volumes of KRas<sup>G12D</sup> OVCAR3 tumor in NSG mice*

|                                                                           |          |
|---------------------------------------------------------------------------|----------|
| Between Vehicle and anti-KRas <sup>G12D</sup> IgA1                        | P=0.0471 |
| Between Vehicle and MRTX1133 every 4 day                                  | P=0.0454 |
| Between Vehicle and MRTX1133 daily                                        | P=0.0495 |
| Between MRTX1133 every 4 day and anti-KRas <sup>G12D</sup> IgA1           | P=0.0499 |
| Between MRTX1133 daily and anti-KRas <sup>G12D</sup> IgA1                 | P=0.0323 |
| Between MRTX1133 every 4 day and MRTX1133 daily                           | P=0.0580 |
| Between Vehicle and IrrIgA                                                | P=0.0471 |
| Between IrrIgA and anti-KRas <sup>G12D</sup> IgA1                         | P=0.0482 |
| Between Vehicle and anti-KRas <sup>G12D</sup> IgG4                        | P=0.0301 |
| Between IrrIgA and anti-KRas <sup>G12D</sup> IgG4                         | P=0.0928 |
| Between anti-KRas <sup>G12D</sup> IgA1 and anti-KRas <sup>G12D</sup> IgG4 | P=0.0652 |
| Between MRTX1133 every 4 Day and anti-KRas <sup>G12D</sup> IgG4           | P=0.1585 |
| Between MRTX1133 daily and IrrIgA                                         | P=0.0603 |
| Between MRTX1133 daily and anti-KRas <sup>G12D</sup> IgG4                 | P=0.0758 |
| Between MRTX1133 every 4 Day and IrrIgA                                   | P=0.0561 |

Statistical test used-Paired two-tailed t-test

### *Tumor weights of KRas<sup>G12D</sup> OVCAR3 tumor in NSG mice*

|                                                                           |          |
|---------------------------------------------------------------------------|----------|
| Between Vehicle and anti-KRas <sup>G12D</sup> IgA1                        | P<0.0001 |
| Between Vehicle and MRTX1133 every 4 day                                  | P=0.0195 |
| Between Vehicle and MRTX1133 daily                                        | P<0.0001 |
| Between MRTX1133 every 4 day and anti-KRas <sup>G12D</sup> IgA1           | P=0.0005 |
| Between MRTX1133 daily and anti-KRas <sup>G12D</sup> IgA1                 | P=0.1676 |
| Between MRTX1133 every 4 day and MRTX1133 daily                           | P=0.0036 |
| Between Vehicle and IrrIgA                                                | P=0.0027 |
| Between IrrIgA and anti-KRas <sup>G12D</sup> IgA1                         | P=0.0020 |
| Between Vehicle and anti-KRas <sup>G12D</sup> IgG4                        | P=0.6291 |
| Between IrrIgA and anti-KRas <sup>G12D</sup> IgG4                         | P=0.0078 |
| Between anti-KRas <sup>G12D</sup> IgA1 and anti-KRas <sup>G12D</sup> IgG4 | P<0.0001 |
| Between MRTX1133 every 4 Day and anti-KRas <sup>G12D</sup> IgG4           | P=0.0519 |
| Between MRTX1133 daily and IrrIgA                                         | P=0.0163 |
| Between MRTX1133 daily and anti-KRas <sup>G12D</sup> IgG4                 | P<0.0001 |
| Between MRTX1133 every 4 Day and IrrIgA                                   | P=0.4237 |

Statistical test used-Unpaired two-tailed t-test

## **Supplemental Figure 5A**

Anenocarcinoma vs. Squamous cell carcinoma

% of CD3<sup>+</sup> cells in PCK<sup>+</sup> cells P=0.5988

% of PIGR<sup>+</sup> cells in PCK<sup>+</sup> cells P=0.4288

% of IgA coated cells in PCK<sup>+</sup> cells P=0.1123

% of IgG coated cells in PCK<sup>+</sup> cells P=0.4718

Statistical test used-Unpaired two-tailed t-test

## Supplemental Figure 5C

### *Tumor volumes of KRas<sup>G12D</sup> A427 tumor in NSG mice*

|                                                                           |          |
|---------------------------------------------------------------------------|----------|
| Between Vehicle and anti-KRas <sup>G12D</sup> IgA1                        | P=0.0220 |
| Between Vehicle and anti-KRas <sup>G12D</sup> IgG4                        | P=0.0264 |
| Between Vehicle and MRTX1133 every 4 day                                  | P=0.0331 |
| Between Vehicle and MRTX1133 daily                                        | P=0.0197 |
| Between MRTX1133 every 4 day and anti-KRas <sup>G12D</sup> IgA1           | P=0.0134 |
| Between MRTX1133 daily and anti-KRas <sup>G12D</sup> IgA1                 | P=0.0309 |
| Between MRTX1133 every 4 day and anti-KRas <sup>G12D</sup> IgG4           | P=0.0568 |
| Between MRTX1133 daily and anti-KRas <sup>G12D</sup> IgG4                 | P=0.0145 |
| Between anti-KRas <sup>G12D</sup> IgG4 and anti-KRas <sup>G12D</sup> IgA1 | P=0.0205 |
| Between MRTX1133 every 4 day and MRTX1133 daily                           | P=0.0047 |
| Between Vehicle and irrIgA                                                | P=0.0236 |
| Between IrrIgA and anti-KRas <sup>G12D</sup> IgA1                         | P=0.0202 |
| Between IrrIgA and anti-KRas <sup>G12D</sup> IgG4                         | P=0.0223 |
| Between IrrIgA and MRTX1133 every 4 day                                   | P=0.0018 |
| Between IrrIgA and MRTX1133 daily                                         | P=0.0138 |

Statistical test used-Paired two-tailed t-test

### *Tumor weights of KRas<sup>G12D</sup> A427 tumor in NSG mice*

|                                                                           |          |
|---------------------------------------------------------------------------|----------|
| Between Vehicle and anti-KRas <sup>G12D</sup> IgA1                        | P<0.0001 |
| Between Vehicle and anti-KRas <sup>G12D</sup> IgG4                        | P=0.1670 |
| Between Vehicle and MRTX1133 every 4 day                                  | P=0.0184 |
| Between Vehicle and MRTX1133 daily                                        | P=0.0010 |
| Between MRTX1133 every 4 day and anti-KRas <sup>G12D</sup> IgA1           | P<0.0001 |
| Between MRTX1133 daily and anti-KRas <sup>G12D</sup> IgA1                 | P=0.0002 |
| Between MRTX1133 every 4 day and anti-KRas <sup>G12D</sup> IgG4           | P=0.2699 |
| Between MRTX1133 daily and anti-KRas <sup>G12D</sup> IgG4                 | P=0.0169 |
| Between anti-KRas <sup>G12D</sup> IgG4 and anti-KRas <sup>G12D</sup> IgA1 | P<0.0001 |
| Between MRTX1133 every 4 day and MRTX1133 daily                           | P=0.0818 |
| Between Vehicle and irrIgA                                                | P=0.0145 |
| Between IrrIgA and anti-KRas <sup>G12D</sup> IgA1                         | P=0.0005 |
| Between IrrIgA and anti-KRas <sup>G12D</sup> IgG4                         | P=0.1995 |
| Between IrrIgA and MRTX1133 every 4 day                                   | P=0.7465 |
| Between IrrIgA and MRTX1133 daily                                         | P=0.2417 |

Statistical test used-Unpaired two-tailed t-test



## Supplemental Figure 5D

### *Tumor volumes of KRas<sup>G12D</sup> SK-LU-1 tumor in NSG mice*

|                                                                           |          |
|---------------------------------------------------------------------------|----------|
| Between Vehicle and anti-KRas <sup>G12D</sup> IgA1                        | P=0.0308 |
| Between Vehicle and anti-KRas <sup>G12D</sup> IgG4                        | P=0.0597 |
| Between Vehicle and MRTX1133 every 4 day                                  | P=0.0491 |
| Between Vehicle and MRTX1133 daily                                        | P=0.0259 |
| Between MRTX1133 every 4 day and anti-KRas <sup>G12D</sup> IgA1           | P=0.0235 |
| Between MRTX1133 daily and anti-KRas <sup>G12D</sup> IgA1                 | P=0.0485 |
| Between MRTX1133 every 4 day and anti-KRas <sup>G12D</sup> IgG4           | P=0.0404 |
| Between MRTX1133 daily and anti-KRas <sup>G12D</sup> IgG4                 | P=0.0190 |
| Between anti-KRas <sup>G12D</sup> IgG4 and anti-KRas <sup>G12D</sup> IgA1 | P=0.0263 |
| Between MRTX1133 every 4 day and MRTX1133 daily                           | P=0.0135 |
| Between Vehicle and irrIgA                                                | P=0.0291 |
| Between IrrIgA and anti-KRas <sup>G12D</sup> IgA1                         | P=0.0335 |
| Between IrrIgA and anti-KRas <sup>G12D</sup> IgG4                         | P=0.0210 |
| Between IrrIgA and MRTX1133 every 4 day                                   | P=0.0141 |
| Between IrrIgA and MRTX1133 daily                                         | P=0.0156 |

Statistical test used-Paired two-tailed t-test

### *Tumor weights of KRas<sup>G12D</sup> SK-LU-1 tumor in NSG mice*

|                                                                           |          |
|---------------------------------------------------------------------------|----------|
| Between Vehicle and anti-KRas <sup>G12D</sup> IgA1                        | P=0.0095 |
| Between Vehicle and anti-KRas <sup>G12D</sup> IgG4                        | P=0.5249 |
| Between Vehicle and MRTX1133 every 4 day                                  | P=0.2525 |
| Between Vehicle and MRTX1133 daily                                        | P=0.0279 |
| Between MRTX1133 every 4 day and anti-KRas <sup>G12D</sup> IgA1           | P=0.0259 |
| Between MRTX1133 daily and anti-KRas <sup>G12D</sup> IgA1                 | P=0.2028 |
| Between MRTX1133 every 4 day and anti-KRas <sup>G12D</sup> IgG4           | P=0.5024 |
| Between MRTX1133 daily and anti-KRas <sup>G12D</sup> IgG4                 | P=0.0265 |
| Between anti-KRas <sup>G12D</sup> IgG4 and anti-KRas <sup>G12D</sup> IgA1 | P=0.0060 |
| Between MRTX1133 every 4 day and MRTX1133 daily                           | P=0.1142 |
| Between Vehicle and irrIgA                                                | P=0.0719 |
| Between IrrIgA and anti-KRas <sup>G12D</sup> IgA1                         | P=0.0715 |
| Between IrrIgA and anti-KRas <sup>G12D</sup> IgG4                         | P=0.1092 |
| Between IrrIgA and MRTX1133 every 4 day                                   | P=0.3604 |
| Between IrrIgA and MRTX1133 daily                                         | P=0.3942 |

Statistical test used-Unpaired two-tailed t-test

## **Supplemental Figure 5E**

### ***Tumor volumes of KRas<sup>G12D</sup> Brpkp110 tumor in C57/BL6 mice***

Between anti-KRas<sup>G12D</sup> IgG4 and anti-KRas<sup>G12D</sup> IgA1 P=0.0287

Between IrrIgA and anti-KRas<sup>G12D</sup> IgA1 P=0.0435

Between IrrIgA and anti-KRas<sup>G12D</sup> IgG4 P=0.6565

Statistical test used-Paired two-tailed t-test

### ***Tumor Weights of KRas<sup>G12D</sup> Brpkp110 tumor in C57/BL6 mice***

Between anti-KRas<sup>G12D</sup> IgG4 and anti-KRas<sup>G12D</sup> IgA1 P=0.0338

Between IrrIgA and anti-KRas<sup>G12D</sup> IgA1 P=0.0077

Between IrrIgA and anti-KRas<sup>G12D</sup> IgG4 P=0.7642

Statistical test used-Unpaired two-tailed t-test
